# Supplementary material for: DIA1R Is an X-Linked Gene Related to Deleted In Autism-1
Source: PubMed Central journal article supplement (PMC3022024; doi:10.1371/journal.pone.0014534), 2011-01-17

**Figure S1. Neural network prediction of signal peptides in human DIA1 and DIA1R.** The amino acid sequence of (A) human DIA1 or (B) human DIA1R, was evaluated for amino-terminal signal peptides using the neural network (NN) algorithm of SignalP v3.0 [51]. The C-score (cleavage score for each amino acid) is indicated in red, the S-score (signal peptide score) is indicated in green, and the Y-score (derived from the C-score and S-score, and can give a better indication of the cleavage site) is indicated in blue. The significance cut-off value for all probability scores is 0.5, and is indicated by a pink dotted line. Standard single-letter amino acid abbreviations and numbering is provided are provided below the graph.

**Fig. S1**

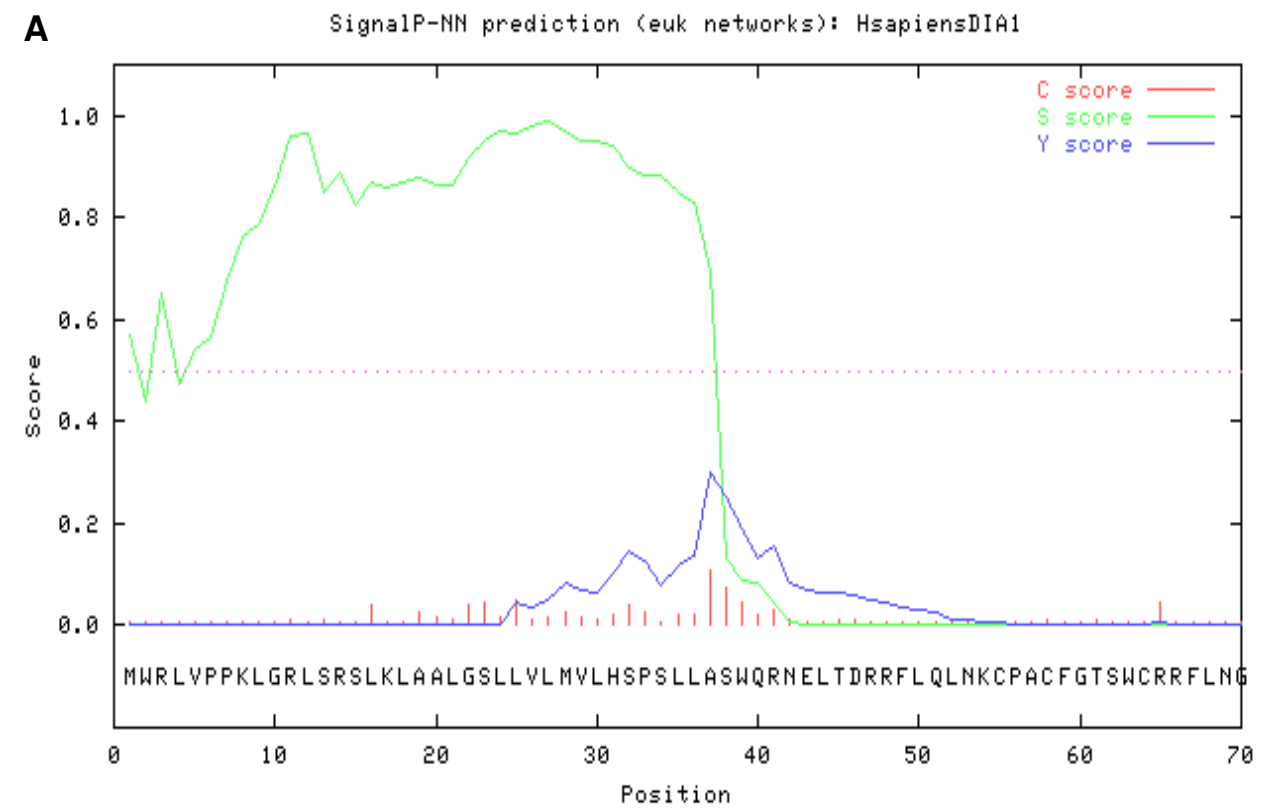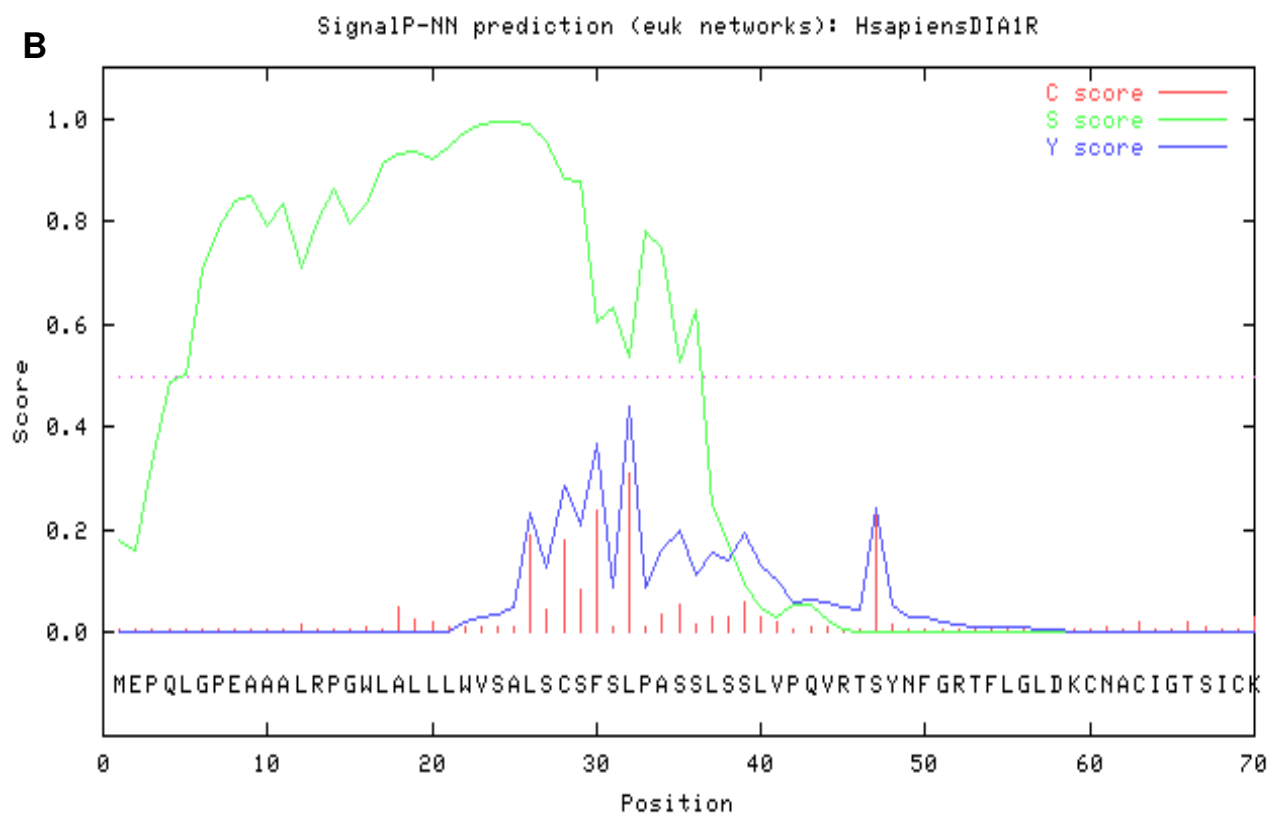

Supplement: pone.0014534.s001.pdf [file pone.0014534.s001.pdf]
