# Supplementary material for: DIA1R Is an X-Linked Gene Related to Deleted In Autism-1
Source: PubMed Central journal article supplement (PMC3022024; doi:10.1371/journal.pone.0014534), 2011-01-17

**Figure S3. BioGPS microarray expression data for *DIA1R*.** Graphical presentation of expression data for *DIA1* in a variety of normal, and cancerous human tissues and cells. Expression values were obtained from an Affymetrix U133A microarray and relate to fluorescence intensity. Multiple probes were used for each transcript on the microarray and these intensity values have been normalized, background-subtracted, and summarized using the GCRMA (GeneChip Robust Multi-array Average) data-processing algorithm. The identifier of the Affymetrix probe set used is indicated above the graph. Data were obtained from the Gene Atlas database of human genes [55] at the BioGPS gene portal server [56].

Fig. S3

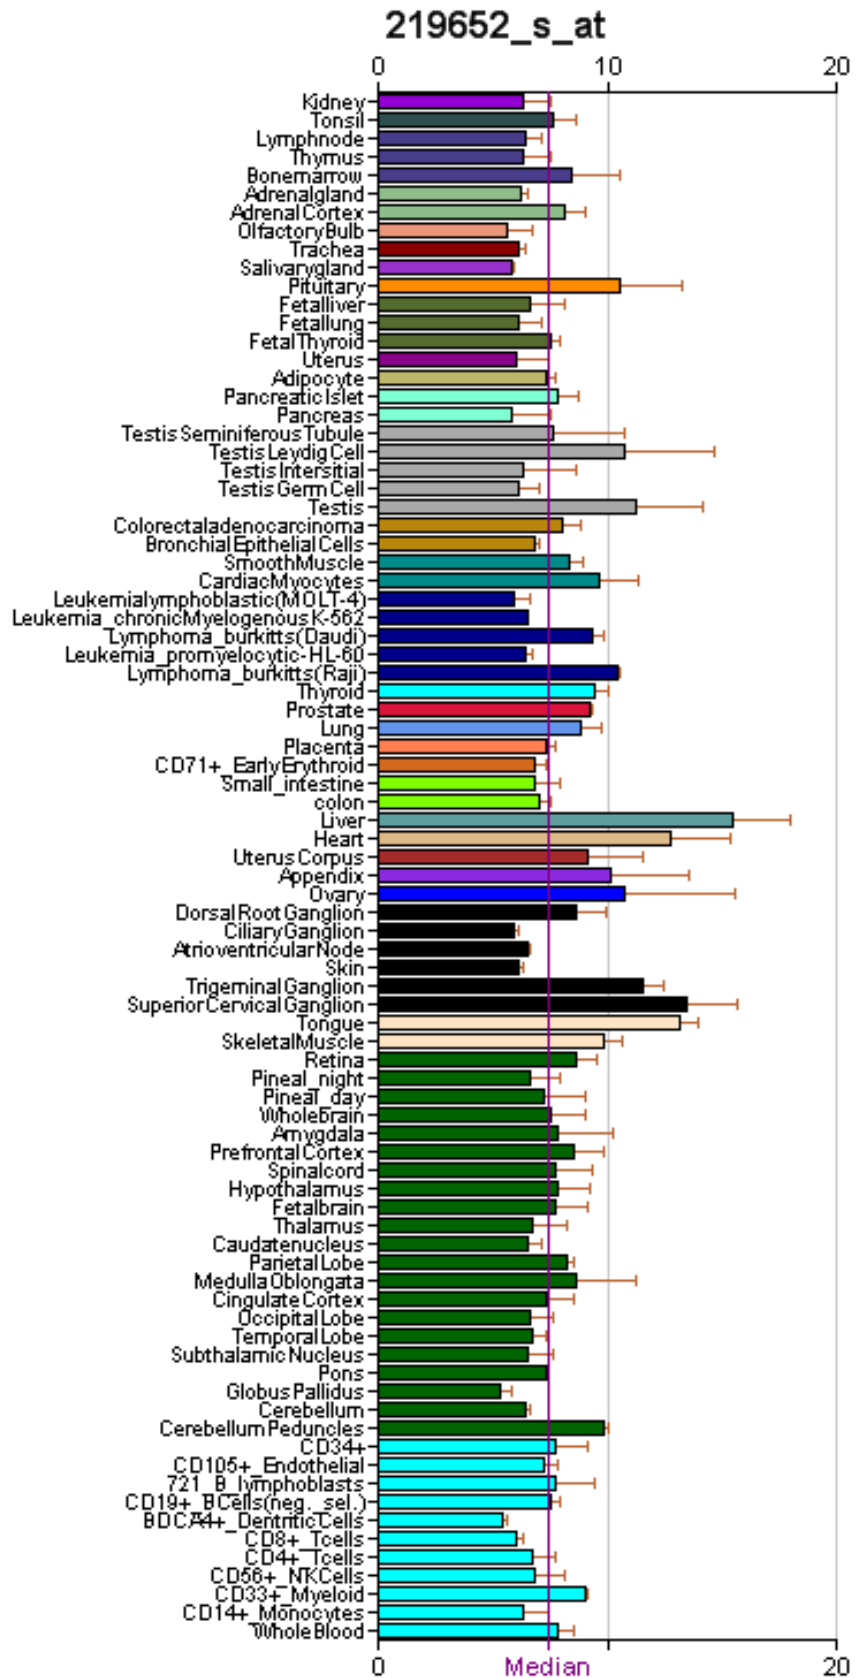

Supplement: pone.0014534.s003.pdf [file pone.0014534.s003.pdf]
